# Supplementary material for: A real-time fluorescence polarization activity assay to screen for inhibitors of bacterial ribonuclease P
Source: Oxford University Press journal article supplement (doi:10.1093/nar/gku850), 2014-09-23
Supplement: gku850_Supplementary_Data.zip [file gku850_Supplementary_Data.zip]

Archive with 1 entries (1 files):
- nar-02208-met-k-2014-File010.pdf
