# Supplementary material for: A real-time fluorescence polarization activity assay to screen for inhibitors of bacterial ribonuclease P
Source: Oxford University Press journal article supplement (doi:10.1093/nar/gku850), 2014-09-23
Supplement: gku850_Supplementary_Data.zip [file gku850_Supplementary_Data.zip › nar-02208-met-k-2014-File010.pdf]

## Supplementary Data:

### A real-time fluorescence polarization activity assay to screen for inhibitors of bacterial ribonuclease P

Xin Liu<sup>1</sup>, Yu Chen<sup>1</sup> and Carol A. Fierke<sup>1,2,\*</sup>

<sup>1</sup> Department of Chemistry, University of Michigan, Ann Arbor, Michigan, 48109, USA

<sup>2</sup> Department of Biological Chemistry, University of Michigan Medical School, Ann Arbor, Michigan, 48109, USA

\*To whom correspondence should be addressed. Tel: 01-734-936-2678; Fax: 01-734-647-4865; Email: fierke@umich.edu

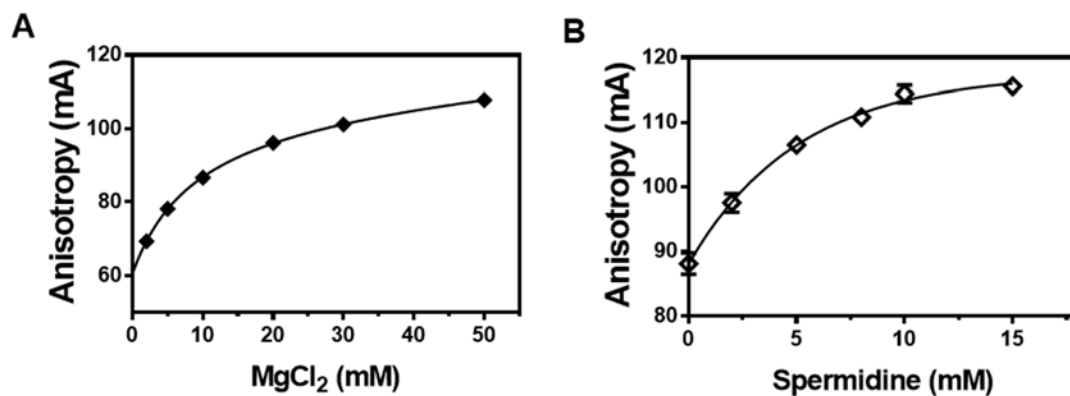

**Figure S1.** Fluorescence anisotropy (FA) of FI-pre-tRNA<sup>Asp</sup> in response to cation concentrations. **(A)** FA of FI-pre-tRNA<sup>Asp</sup> increased with increasing Mg<sup>2+</sup> concentration measured in 50 mM Tris-HCl pH 7.2, 100 mM KCl, 20 mM DTT with 20 nM FI-pre-tRNA<sup>Asp</sup>. Samples in duplicates were incubated in the plate for at least 15 min before reading at room temperature, G factor=0.99. **(B)** FA of FI-pre-tRNA<sup>Asp</sup> increased with increasing concentration of spermidine. Measured in identical buffer conditions as A with 10 mM MgCl<sub>2</sub>.

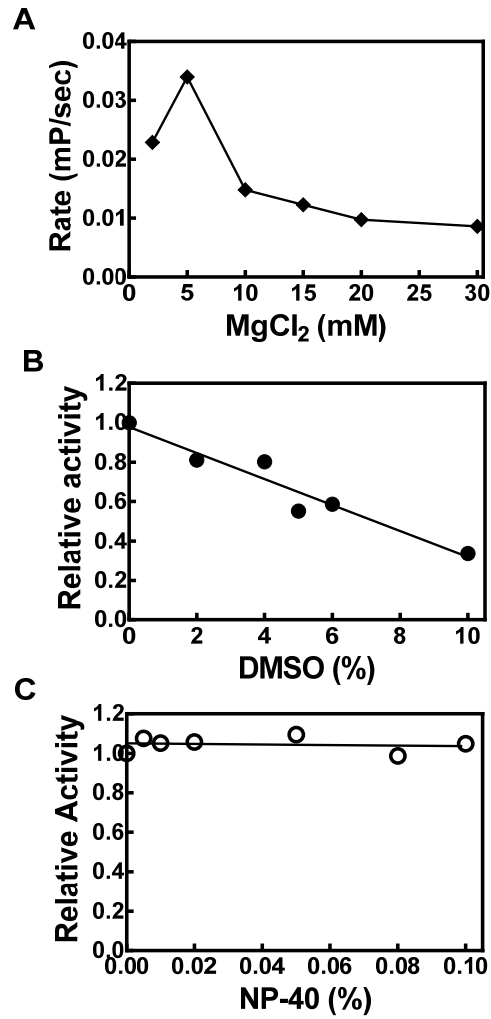

**Figure S2.** Test of RNase P cleavage activity in response to varying  $Mg^{2+}$ , DMSO and NP-40 concentrations. **(A)** The RNase P activity was measured in duplicate in 50 mM Tris-HCl pH 7.2, varying  $MgCl_2$ , 100 mM KCl, 20 mM DTT, 10 mM spermidine with 20 nM FI-pre-tRNA<sup>Asp</sup>, 0.4 nM *B. subtilis* RNase P and 4 nM P protein at room temperature. **(B)** Activity measured as described in A with 10 mM  $MgCl_2$ , 50 nM FI-pre-tRNA<sup>Asp</sup>, 4 nM RNase P, 6 nM P protein and varying DMSO (v/v). **(C)** Activity measured as described in B except with 1 nM RNase P.

**Table S1.** List of kinetic parameters and goodness of fit from the global fit of RNase P activity to mixed mode of inhibition<sup>a</sup>.

| Best-fit values        | Mixed  |         | Mixed with Cooperativity |         |
|------------------------|--------|---------|--------------------------|---------|
|                        |        |         |                          |         |
| $k_{cat}$              | 0.159  | ± 0.003 | 0.159                    | ± 0.003 |
| $K_M$                  | 15     | ± 1     | 16                       | ± 1     |
| $n_i$                  | 1      |         | 1.4                      | ± 0.1   |
| $K_i$                  | 130    | ± 10    | 220                      | ± 20    |
| $n_{is}$               | 1      |         | 0.9                      | ± 0.1   |
| $K_{is}$               | 480    | ± 20    | 470                      | ± 30    |
| <b>Goodness of Fit</b> |        |         |                          |         |
| R square (weighted)    | 0.9775 |         | 0.9832                   |         |

<sup>a</sup> Assays were carried out as described in the legend of Figure 8 and the global fitting by Equation 7 was performed using GraphPad Prism 5.03 software.
